# Supplementary material for: Protective Effect of Qiliqiangxin Capsule on Energy Metabolism and Myocardial Mitochondria in Pressure Overload Heart Failure Rats
Source: Hindawi journal article supplement (doi:10.1155/2013/378298), 2013-01-01
Supplement: f1 [file 378298.f1.pdf]

## **Pharmacology and Safety Review of Qili Qiangxin Capsules**

Qili Qiangxin capsules received a Chinese new drug certificate (China Food and Drug Administration Approval No. Z20040141) in 2004 and a patent under the title “A kind of pharmaceutical composition and a preparation method for treating chronic cardiac failure” in 2005 (Patent No. ZL02146573.8). Qili Qiangxin capsules consist of 11 types of herbs: Astragali Radix, Ginseng Radix et Rhizoma, Aconiti Lateralis Radix Preparata, Salvia Miltiorrhiza Radix et Rhizoma, Descurainiae Semen Lepidii Semen, Alismatis Rhizoma, Polygonati Odorati Rhizoma, Cinnamomi Ramulus, Carthami Flos, Periplocae Cortex and Citri Reticulatae Pericarpium. All of these ingredients are included in the Chinese pharmacopoeia.

According to traditional Chinese medicine (TCM) theory, Chinese herbs are generally prescribed in formulas that contain “king” medicines, which provide the strongest therapeutic action; “minister” medicines, which assist the “king” medicine in its therapeutic actions; “assistant” medicines, which aid the “minister” medicine in treating a lesser aspect of the disease; and “ambassador” medicines intended to reduce the toxicity of the other medicines in the formula or guide the formula to the targeted organ or region of the body. In the Qili Qiangxin formula,

the “king” medicines are Astragali Radix and Aconiti Lateralis Radix Preparata. To guarantee the quality and consistency of Qili Qiangxin capsules, the raw medicinal materials were of a certain variety, and their areas of origin, medicinal parts and processing methods were kept consistent. The ingredients of the Qili Qiangxin capsules are shown in Table 1.

### **1. Quality control and chemical component study**

The quality control of the production process of Qili Qiangxin capsules strictly adhered to the GMP of national drug production. To verify the stability of the product, we analyzed 10 batches of Qili Qiangxin capsules and fingerprints using the software “Chinese medicine chromatographic fingerprint similarity evaluation system version 2004 A”, which was developed by a committee of the national pharmacopoeia. The multipoint correction and automating matching were performed for each chromatographic peak of the fingerprint with the average correlation coefficient method, and reference fingerprint chromatograms (R) of the common mode of Qili Qiangxin capsules were obtained. Then, the similarity calculation was performed. The similarity of 10 batches of Qili Qiangxin capsules and the reference fingerprint is shown in Table 2. The results showed that the fingerprint similarity of these

batches was greater than 95%, which indicates that the product was stable and controllable.

As the chemical components of this medicine are complex and varied, we adopted a chromatographic process to separate and analyze the chemical components to study the material basis of Qili Qiangxin capsules. LC-MS/MS (AB SCIEX Triple TOF™ 5600) analysis was performed for the Qili Qiangxin Capsule compound components, and nearly 200 compounds were identified (Figures 2, 3). The component compounds of Qili Qiangxin identified with liquid chromatography mass spectrometry (LC-MS/MS) that exhibited physiological activity are listed below.

**1.1 Ginseng saponin compounds:** Ginsenoside Rg1, ginsenoside Re, ginsenoside Rb1, ginsenoside Rc, ginsenoside Rd, ginsenoside Rf, ginsenoside Ro, ginsenoside Rb2, ginsenoside F3, ginsenoside F7, ginsenoside F5, 20(S)-ginsenoside F1, 20(R)-ginsenoside F1, ginsenoside F2, ginsenoside Rg7, 20(S)-ginsenoside Rg2, 20(R)-ginsenoside Rg2, ginsenoside Ra1, ginsenoside Ra2, ginsenoside Ra3, 20(S)-ginsenoside Rh1, 20(R)-ginsenoside Rh1, ginsenoside A, ginsenoside P, ginsenoside La, ginsenoside F4, ginsenoside Rh4, 20(S)-ginsenoside Rg3, 20(R)-ginsenoside Rg3 and others. The majority of ginseng saponin compounds have been shown to improve hypoxia tolerance, slow the heart rate,

increase cardiac output and coronary blood flow and enhance myocardial contractility (1-9).

**1.2 Astragalus saponin compounds:** Astragaloside V, astragaloside VII, astragaloside VI, astragaloside VIII, astragaloside I, isoastragaloside I, astragaloside IV and others. Astragalus saponin compounds protect myocardial cells and blood vessel endothelium and improve blood flow (10-13).

**1.3 Phenolic acid compounds:** Salvianolic acid A, salvianolic acid B, salvianolic acid C, salvianolic acid D, salvianolic acid E, salvianolic acid F, salvianolic acid H and others. Phenolic acid compounds possess antioxidant, anti-inflammatory and anti-platelet aggregation activity (14-18).

**1.4 Flavonoid compounds:** Isoquercitrin, rutin, quercimeritrin, quercetin-3-O- $\beta$ -D-glucopyranoside, quercetin, kaempferol-7-O- $\beta$ -D-glucopyranoside, quercetin-3-O- $\alpha$ -L-rhamnopyranoside, isorhamnetin-3-O-glucoside, calycosin-7-O- $\beta$ -D-Glucopyranoside-6''-O-malonate, isomucronulatol-7-O-glucoside, isomucronulatol-7,2'-di-O-glucoside, calycosin, 7-hydroxy-5,6,8,4'-tetramethoxyflavone and others. Flavonoid

compounds possess anti-oxidant and anti-inflammatory activity (19-24).

**1.5 Cardenolide compounds:** Periplocoside, periplocoside G, russelioside D, S-4a, S-4b, S-5, S-6 and others. These compounds demonstrate excellent activity in strengthening the heart (25, 26).

## **2. Toxicological study of Qili Qiangxin capsules**

The clinical dosage of Qili Qiangxin capsules was 0.056 g/kg/d. The acute toxicity test in rats showed that the maximum administration dosage of rat was 32.73 g/kg/d, which was 584.27 times the clinical dosage. No deaths in rats were observed.

## **3 Mechanisms of action for Qili Qiangxin capsules in heart disease treatment**

Zou et al. compared the effects of Qili Qiangxin capsules on the development of cardiac hypertrophy to those of losartan in mice undergoing transverse aortic constriction. Cardiac hypertrophy, function and remodeling were evaluated by echocardiography, catheterization, histology and examination of specific gene expression and ERK phosphorylation. The results showed that Qili Qiangxin capsules inhibited myocardial inflammation and cardiomyocyte death and promoted cardiomyocyte proliferation, leading to amelioration in cardiac remodeling and function in a mouse model of pressure overload. The potential mechanisms

responsible for these effects may involve the inhibition of the angiotensin II type 1 receptor and activation of ErbB receptors (27).

Xiao et al. investigated the effects of Qili Qiangxin capsules on cardiac function and expression of the pro-inflammatory cytokine TNF  $\alpha$  and the anti-inflammatory cytokine IL-10 in rats with myocardial infarction. The results indicated that Qili Qiangxin treatment significantly improved cardiac function and histopathologic changes with down-regulated ratio of TNF- $\alpha$ /IL-10. These data suggest that Qili Qiangxin may improve the cardiac function of rats with myocardial infarction by regulating the balance between TNF- $\alpha$  and IL-10. Thus, one potential immunopharmacologic mechanism underlying the beneficial effects of Qili Qiangxin may involve the balance between pro-inflammatory and anti-inflammatory cytokines in cardiomyocytes (28).

Liu et al. evaluated the effects of oral high-dose (4 g/kg/d) and low-dose (1 g/kg/d) Qili Qiangxin capsules on cardiac function in spontaneously hypertensive rats (SHRs). Echocardiography was performed to evaluate cardiac function and hemodynamic parameters. In addition, hematoxylin and eosin (HE) and Masson's trichrome staining were performed, and the expression levels of

myocardial angiotensin (Ang)-converting enzyme, chymase, TGF- $\beta$  and collagen-type I and III were evaluated with real-time reverse transcription-PCR. The results showed that in SHRs, the number of chymase enzyme-positive mast cells increased in the left ventricle in comparison to WKY rats. Moreover, Qili Qiangxin capsules significantly decreased mast cell density and cardiac chymase levels and improved the ejection fraction and cardiac systolic function as compared to vehicle treatment, and Qili Qiangxin capsules also decreased left atrial diameters and improved the E/A ratio. Treatment with Qili Qiangxin capsules was also shown to suppress the mRNA levels of collagen type I and III and TGF- $\beta$ , as well as AngII activity, in a dose-dependent manner. Whereas no difference in ACE activity was found between SHRs, chymase expression and activity were significantly decreased following treatment with Qili Qiangxin capsules. These data suggest that Qili Qiangxin capsules improve both systolic and diastolic cardiac function in SHRs by down-regulating the cardiac chymase signaling pathway and chymase-mediated AngII production (29).

Wei et al. compared the effects of different doses of Qili Qiangxin capsules on L-type  $\text{Ca}^{2+}$  current ( $I_{\text{Ca-L}}$ ) between normal and hypertrophied myocytes. A total of 40 healthy SD rats were randomly divided into 2 groups (control group and hypertrophy

group), and cardiac hypertrophy was induced by pressure overload produced by partial ligation of the abdominal aorta. The whole-cell patch-clamp technique was used to study the effects of Qili Qiangxin on  $I_{Ca-L}$ . The results showed that the inhibition of  $I_{Ca-L}$  resulting from Qili Qiangxin treatment was lower in the hypertrophy group than in the control group. Thus, the underlying mechanism may be that Qili Qiangxin affects L-type  $Ca^{2+}$  channels and blocks  $I_{Ca-L}$  to affect cardiac function. Qili Qiangxin also demonstrates biphasic action, which makes it act as either a class IV antiarrhythmic agent or an agent that improves cardiac function (30).

## REFERENCES

1. Xie JT, Shao ZH, Vanden Hoek TL et al. Antioxidant effects of ginsenoside Re in cardiomyocytes. *Eur J Pharmacol* 2006;532:201-7.
2. Furukawa T, Bai CX, Kaihara A et al. Ginsenoside Re, a main phytosterol of *Panax ginseng*, activates cardiac potassium channels via a nongenomic pathway of sex hormones. *Mol Pharmacol* 2006;70:1916-24.

3. Wang T, Yu X, Qu S, Xu H, Han B, Sui D. Effect of ginsenoside Rb3 on myocardial injury and heart function impairment induced by isoproterenol in rats. *Eur J Pharmacol* 2010;636:121-5.
4. Wu Y, Xia ZY, Dou J et al. Protective effect of ginsenoside Rb1 against myocardial ischemia/reperfusion injury in streptozotocin-induced diabetic rats. *Mol Biol Rep* 2011;38:4327-35.
5. Li J, Shao ZH, Xie JT et al. The effects of ginsenoside Rb1 on JNK in oxidative injury in cardiomyocytes. *Arch Pharm Res* 2012;35:1259-67.
6. Gai Y, Ma Z, Yu X, Qu S, Sui D. Effect of ginsenoside Rh1 on myocardial injury and heart function in isoproterenol-induced cardiotoxicity in rats. *Toxicol Mech Methods* 2012;22:584-91.
7. Peng L, Sun S, Xie LH, Wicks SM, Xie JT. Ginsenoside Re: pharmacological effects on cardiovascular system. *Cardiovasc Ther* 2012;30:e183-8.
8. Choi WY, Lim HW, Lim CJ. Anti-inflammatory, antioxidative and matrix metalloproteinase inhibitory properties of 20(R)-ginsenoside Rh2 in cultured macrophages and keratinocytes. *J Pharm Pharmacol* 2013;65:310-6.
9. Shin YM, Jung HJ, Choi WY, Lim CJ. Antioxidative, anti-inflammatory, and matrix metalloproteinase inhibitory

activities of 20(S)-ginsenoside Rg3 in cultured mammalian cell lines. Mol Biol Rep 2013;40:269-79.

10. Zhang WD, Chen H, Zhang C, Liu RH, Li HL, Chen HZ. Astragaloside IV from *Astragalus membranaceus* shows cardioprotection during myocardial ischemia in vivo and in vitro. *Planta Med* 2006;72:4-8.
11. Zhang ZC, Li SJ, Yang YZ, Chen RZ, Ge JB, Chen HZ. Effect of astragaloside on cardiomyocyte apoptosis in murine coxsackievirus B3 myocarditis. *J Asian Nat Prod Res* 2007;9:145-51.
12. Zhao Z, Wang W, Wang F et al. Effects of Astragaloside IV on heart failure in rats. *Chin Med* 2009;4:6.
13. Zhao J, Yang P, Li F et al. Therapeutic effects of astragaloside IV on myocardial injuries: multi-target identification and network analysis. *PLoS One* 2012;7:e44938.
14. He H, Shi M, Zeng X et al. Cardioprotective effect of salvianolic acid B on large myocardial infarction mediated by reversing upregulation of leptin, endothelin pathways, and abnormal expression of SERCA2a, phospholamban in rats. *J Ethnopharmacol* 2008;118:35-45.
15. Wang SB, Tian S, Yang F, Yang HG, Yang XY, Du GH. Cardioprotective effect of salvianolic acid A on

- isoproterenol-induced myocardial infarction in rats. *Eur J Pharmacol* 2009;615:125-32.
16. Pan H, Li D, Fang F et al. Salvianolic acid A demonstrates cardioprotective effects in rat hearts and cardiomyocytes after ischemia/reperfusion injury. *J Cardiovasc Pharmacol* 2011;58:535-42.
  17. Xu L, Deng Y, Feng L et al. Cardio-protection of salvianolic acid B through inhibition of apoptosis network. *PLoS One* 2011;6:e24036.
  18. Chen SC, Lin YL, Huang B, Wang DL, Cheng JJ. Salvianolic acid B suppresses IFN-gamma-induced JAK/STAT1 activation in endothelial cells. *Thromb Res* 2011;128:560-4.
  19. Yu DH, Bao YM, Wei CL, An LJ. Studies of chemical constituents and their antioxidant activities from *Astragalus mongholicus* Bunge. *Biomed Environ Sci* 2005;18:297-301.
  20. Kong CS, Kim JA, Qian ZJ et al. Protective effect of isorhamnetin 3-O-beta-D-glucopyranoside from *Salicornia herbacea* against oxidation-induced cell damage. *Food Chem Toxicol* 2009;47:1914-20.
  21. Lee YJ, Kim S, Lee SJ, Ham I, Whang WK. Antioxidant activities of new flavonoids from *Cudrania tricuspidata* root bark. *Arch Pharm Res* 2009;32:195-200.

22. Xu Y, Feng L, Wang S et al. Calycosin protects HUVECs from advanced glycation end products-induced macrophage infiltration. *J Ethnopharmacol* 2011;137:359-70.
23. Kukongviriyapan U, Sompamit K, Pannangpetch P, Kukongviriyapan V, Donpunha W. Preventive and therapeutic effects of quercetin on lipopolysaccharide-induced oxidative stress and vascular dysfunction in mice. *Can J Physiol Pharmacol* 2012;90:1345-53.
24. Bhandary B, Piao CS, Kim DS et al. The protective effect of rutin against ischemia/reperfusion-associated hemodynamic alteration through antioxidant activity. *Arch Pharm Res* 2012;35:1091-7.
25. Gruzina EA. Comparative evaluation of the effect of periplocin and other cardiac drugs in patients with circulatory insufficiency. *Sov Med* 1961;25:38-42.
26. Zhang J, Ni J, Chen ZH et al. Periplocoside A prevents experimental autoimmune encephalomyelitis by suppressing IL-17 production and inhibits differentiation of Th17 cells. *Acta Pharmacol Sin* 2009;30:1144-52.
27. Zou Y, Lin L, Ye Y et al. Qiliqiangxin inhibits the development of cardiac hypertrophy, remodeling, and dysfunction during 4 weeks of pressure overload in mice. *J Cardiovasc Pharmacol* 2012;59:268-80.

28. Xiao H, Song Y, Li Y, Liao YH, Chen J. Qiliqiangxin regulates the balance between tumor necrosis factor- $\alpha$  and interleukin-10 and improves cardiac function in rats with myocardial infarction. *Cell Immunol* 2009;260:51-5.
29. Liu W, Chen J, Xu T et al. Qiliqiangxin improves cardiac function in spontaneously hypertensive rats through the inhibition of cardiac chymase. *Am J Hypertens* 2012;25:250-60.
30. Wei Y, Liu X, Hou L, Che W, The E, Jhummon MV. Qiliqiangxin affects L type  $Ca^{2+}$  current in the normal and hypertrophied rat heart. *Evid Based Complement Alternat Med* 2012;2012:131830.

**Figure 1.** UPLC fingerprints of 10 batches of Qili Qiangxin capsules.

**Figure 2.** Ion-current chromatograms obtained in negative-ion mode.

This figure shows ion-current chromatograms of the chemical component extract screened using negative-ion mode.

**Figure 3.** Ion-current chromatograms collected in positive-ion mode.

This figure shows the ion-current chromatograms of the chemical component extract screened using positive-ion mode.

**Table 1.** Complex compounds contained in Qili Qiangxin capsules.

| Material                             | Species                                                                              | Combination Principle | Origin            | Medicinal Parts    | Concocted               |
|--------------------------------------|--------------------------------------------------------------------------------------|-----------------------|-------------------|--------------------|-------------------------|
| Astragali Radix                      | <i>Astragalus membranaceus</i> (Fisch) Bge.<br>Var. <i>mongholicus</i> (Bge.) Hsiao. | King                  | Longxi,<br>Gansu  | Roots              | Drying                  |
| Ginseng Radix et Rhizoma             | <i>Panax ginseng</i> C. A. Mey.                                                      | Minister              | Fusong, Jilin     | Roots and Rhizomes | Drying                  |
| Aconiti Lateralis Radix Preparata    | <i>Aconitum carmichaeli</i> Debx.                                                    | King                  | Jiangyou, Sichuan | Lateral roots      | Boil, Steam, and Drying |
| Salvia Miltiorrhiza Radix et Rhizoma | <i>Salvia miltiorrhiza</i> Bge.                                                      | Minister              | Yiyuan, Shangdong | Roots              | Drying                  |
| Descurainiae Semen Lepidii Semen     | <i>Lepidium apetalum</i> Willd.                                                      | Minister              | Jinzhou, Hebei    | Seeds              | Drying                  |
| Alismatis Rhizoma                    | <i>Alisma orientalis</i> (Sam.) Juzep.                                               | Assistant             | Sichuan           | Tubers             | Drying                  |
| Polygonati Odorati Rhizoma           | <i>Polygonatum odoratum</i> (Mill.) Druce                                            | Assistant             | Hunan             | Rhizomes           | Drying                  |
| Carthami Flos                        | <i>Carthamus tinctorius</i> L.                                                       | Assistant             | Xinjiang          | Flower             | Drying                  |
| Periplocae Cortex                    | <i>Periploca sepium</i> Bge.                                                         | Assistant             | Shanxi            | Root barks         | Drying                  |

|                                  |                                 |            |          |       |        |
|----------------------------------|---------------------------------|------------|----------|-------|--------|
| Cinnamomi Ramulus                | <i>Cinnamomum cassia</i> Presl  | Assistant  | Guangxi  | Twigs | Drying |
| Citri Reticulatae<br>Pericarpium | <i>Citrus reticulata</i> Blanco | Ambassador | Zhejiang | Peels | Drying |

**Table 2.** The similarity of UPLC fingerprints from the 10 batches Qili Qiangxin capsules.

|     | S1    | S2    | S3    | S4    | S5    | S6    | S7    | S8    | S9    | S10   | R     |
|-----|-------|-------|-------|-------|-------|-------|-------|-------|-------|-------|-------|
| S1  | 1.000 | 0.995 | 0.991 | 0.995 | 0.997 | 0.996 | 0.997 | 0.992 | 0.997 | 0.998 | 0.998 |
| S2  | 0.995 | 1.000 | 0.979 | 0.989 | 0.990 | 0.996 | 0.999 | 0.983 | 0.991 | 0.992 | 0.993 |
| S3  | 0.991 | 0.979 | 1.000 | 0.996 | 0.995 | 0.987 | 0.985 | 0.998 | 0.995 | 0.995 | 0.996 |
| S4  | 0.995 | 0.989 | 0.996 | 1.000 | 0.999 | 0.995 | 0.991 | 0.999 | 0.999 | 0.998 | 0.999 |
| S5  | 0.997 | 0.990 | 0.995 | 0.999 | 1.000 | 0.996 | 0.992 | 0.998 | 0.999 | 0.997 | 0.999 |
| S6  | 0.996 | 0.996 | 0.987 | 0.995 | 0.996 | 1.000 | 0.997 | 0.991 | 0.997 | 0.997 | 0.997 |
| S7  | 0.997 | 0.999 | 0.985 | 0.991 | 0.992 | 0.997 | 1.000 | 0.986 | 0.994 | 0.995 | 0.995 |
| S8  | 0.992 | 0.983 | 0.998 | 0.999 | 0.998 | 0.991 | 0.986 | 1.000 | 0.997 | 0.996 | 0.997 |
| S9  | 0.997 | 0.991 | 0.995 | 0.999 | 0.999 | 0.997 | 0.994 | 0.997 | 1.000 | 1.000 | 1.000 |
| S10 | 0.998 | 0.992 | 0.995 | 0.998 | 0.997 | 0.997 | 0.995 | 0.996 | 1.000 | 1.000 | 0.999 |
| R   | 0.998 | 0.993 | 0.996 | 0.999 | 0.999 | 0.997 | 0.995 | 0.997 | 1.000 | 0.999 | 1.000 |

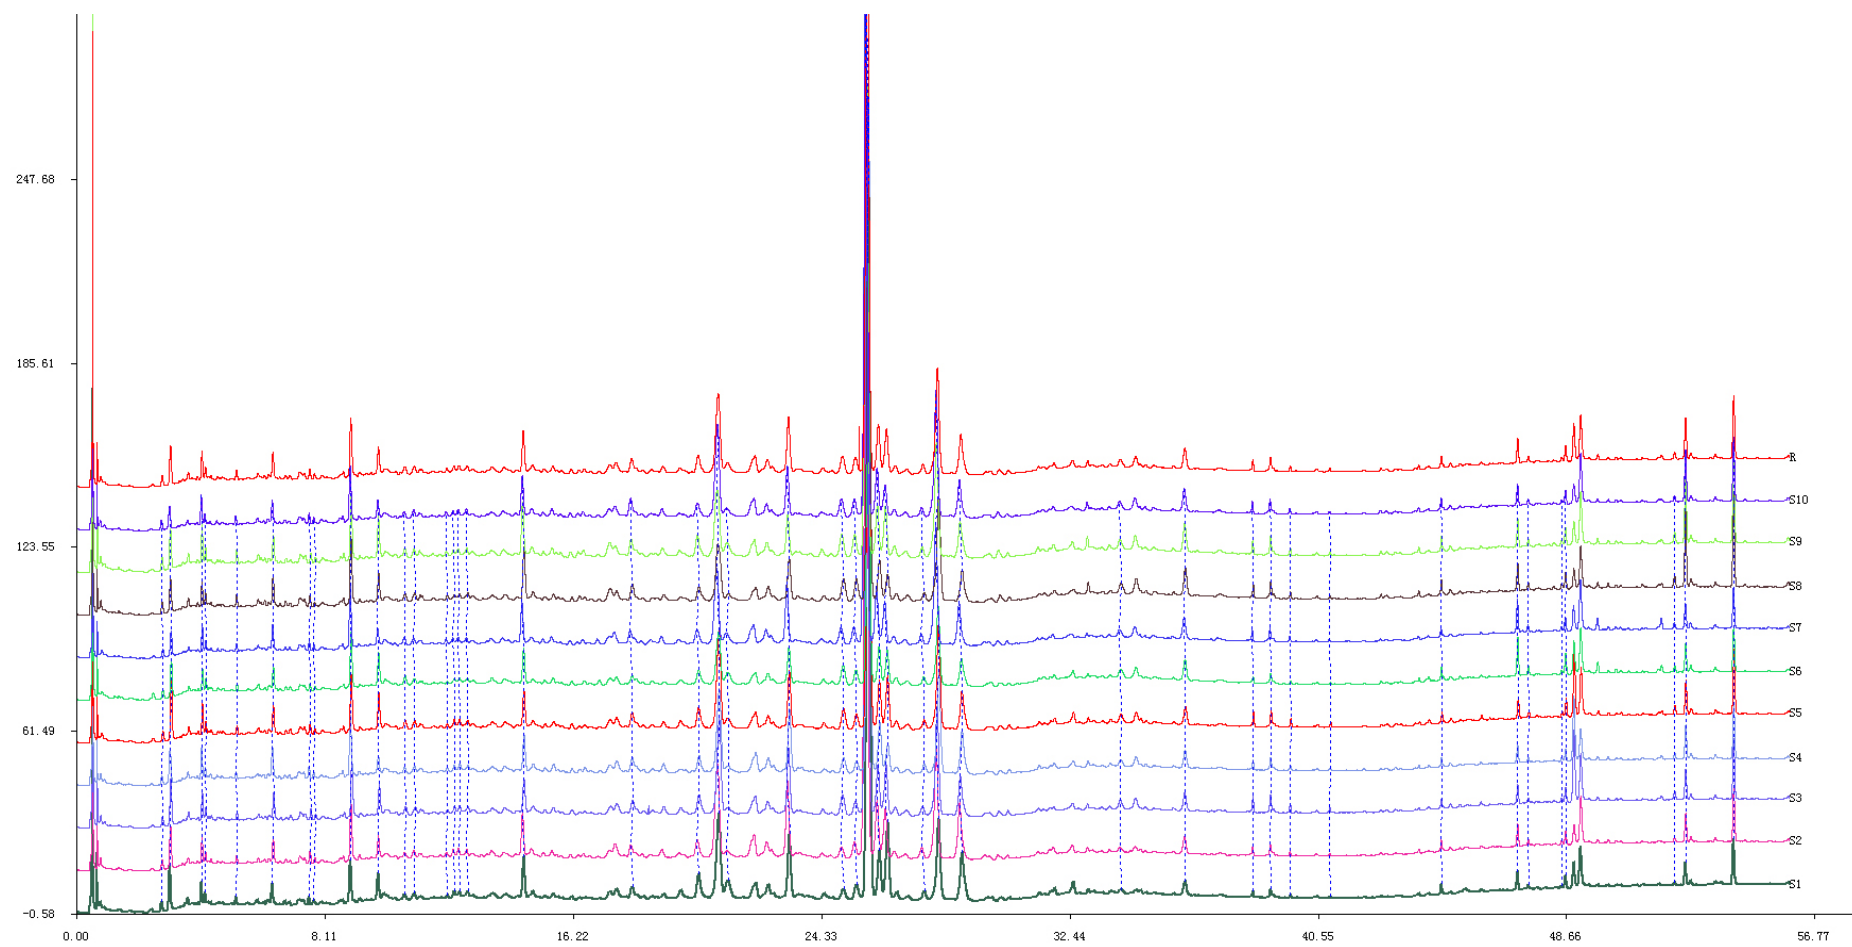

supplementary file-Fig1

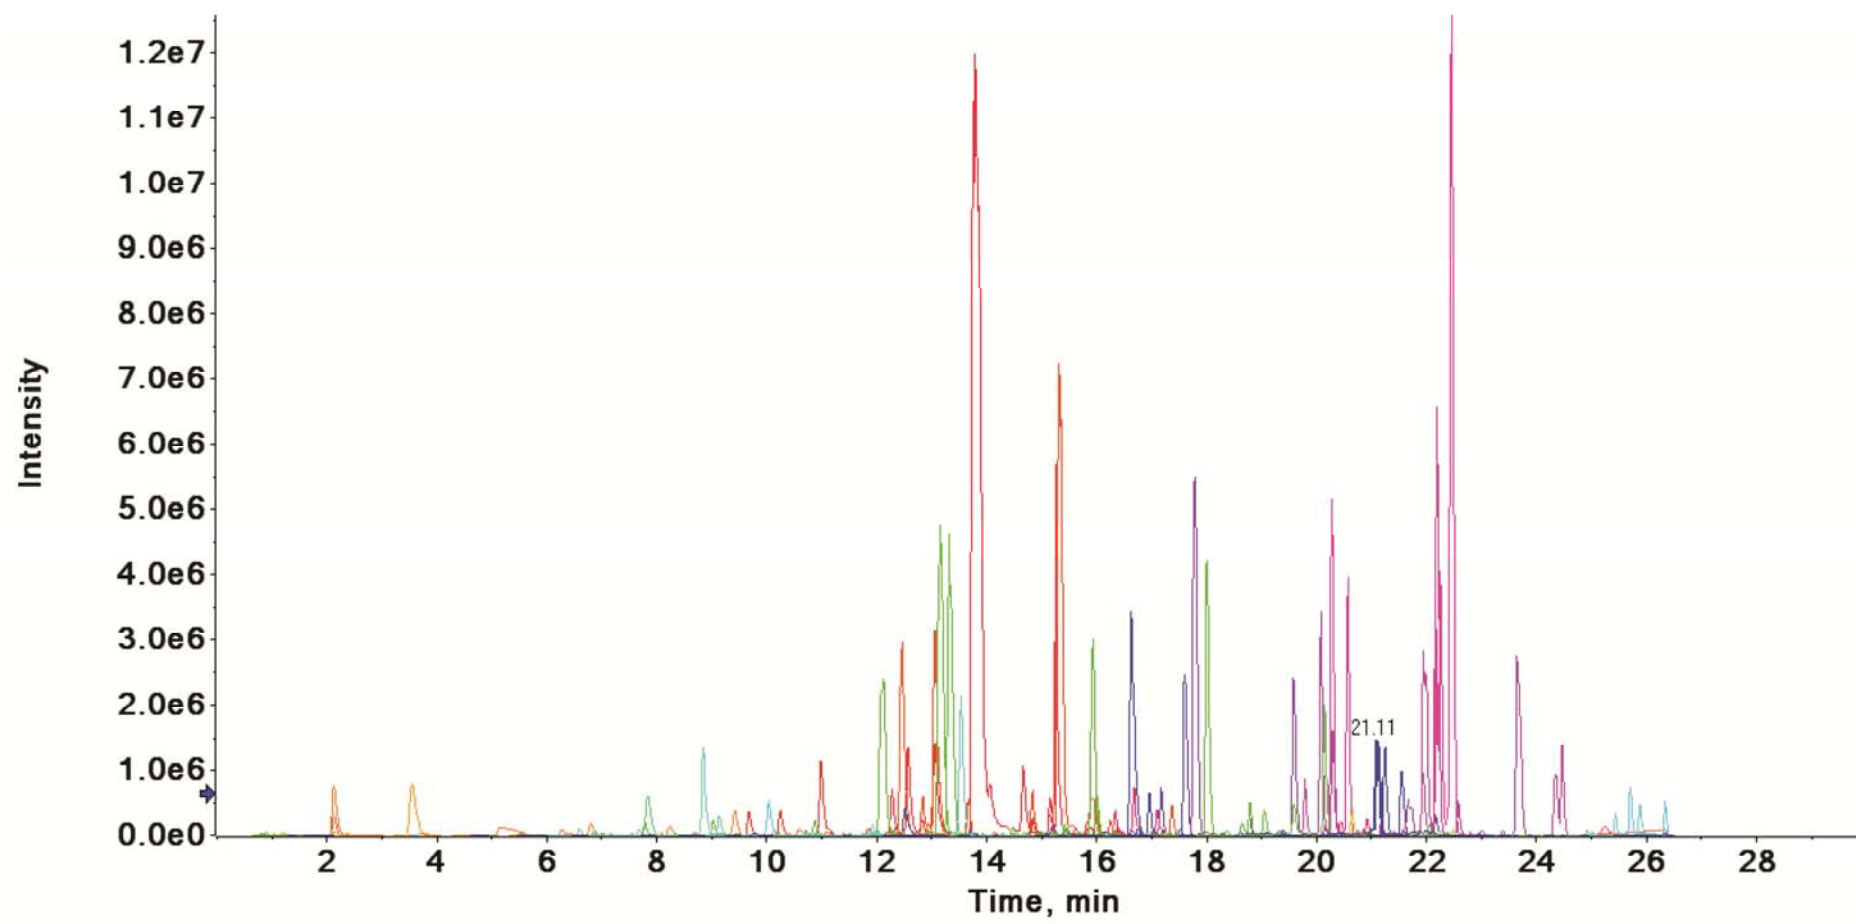

supplementary file-Fig2

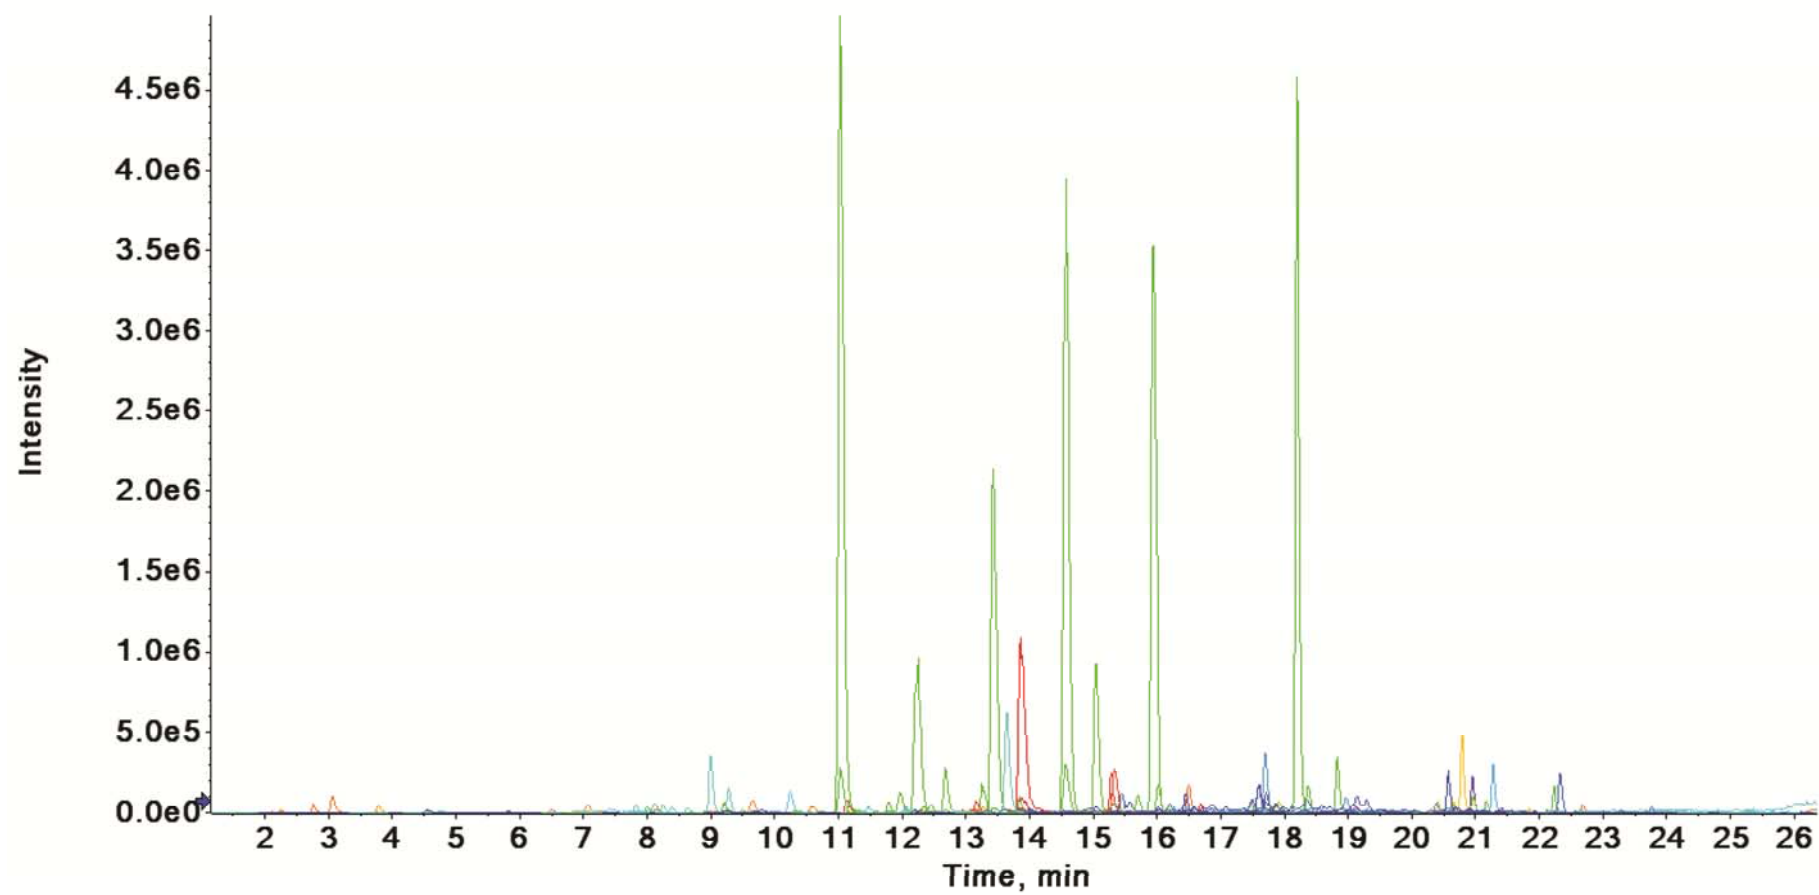

supplementary file-Fig3
